# Supplementary material for: Pyridine-amide-based hetero-copper iodide for the photocatalytic degradation of dyes and aerosol discolouration of VOC gases
Source: Royal Society of Chemistry journal article supplement (doi:10.1039/d3tc04065h), 2024-01-01
Supplement: d3tc04065h1.pdf [file d3tc04065h1.pdf]

## Supporting Information

### Pyridine-amide-based hetero-copper iodide for the photocatalytic degradation of dyes and aerosol discolouration of VOC gases

Ze-Bin Wang,<sup>a</sup> Yu-Hang Zhang,<sup>a</sup> Yi-Lian Sun,<sup>a</sup> Mei-Heng Lv,<sup>a</sup> Yu Liu,<sup>a</sup> Wen-Ze Li,<sup>\*a</sup>

Jian Luan<sup>\*b</sup> and Xiao-Sa Zhang<sup>\*a</sup>

<sup>a</sup> College of Science, Shenyang University of Chemical Technology, Shenyang, 110142, P. R. China

<sup>b</sup> College of Sciences, Northeastern University, Shenyang, 110819, P. R. China.

Emails: wzli@syuct.edu.cn; 2010044@stu.neu.edu.cn; xszhang@syuct.edu.cn

**Table S1** Crystallographic data for the CPs.

| CP                                                              | 1                                                 | 2                                                                                                            |
|-----------------------------------------------------------------|---------------------------------------------------|--------------------------------------------------------------------------------------------------------------|
| CCDC number                                                     | 2277061                                           | 2277062                                                                                                      |
| Formula                                                         | C <sub>7</sub> H <sub>7</sub> N <sub>2</sub> OCuI | C <sub>41</sub> H <sub>46</sub> Cl <sub>9</sub> Cu <sub>4</sub> I <sub>4</sub> N <sub>9</sub> O <sub>4</sub> |
| Formula wt                                                      | 325.59                                            | 1809.72                                                                                                      |
| Crystal system                                                  | Monoclinic                                        | Monoclinic                                                                                                   |
| Space group                                                     | <i>P</i> 2 <sub>1</sub> / <i>c</i> (14)           | <i>P</i> 2 <sub>1</sub> / <i>c</i> (14)                                                                      |
| <i>T</i> (K)                                                    | 296(2)                                            | 293(2)                                                                                                       |
| <i>a</i> (Å)                                                    | 12.3490(5)                                        | 24.0552(16)                                                                                                  |
| <i>b</i> (Å)                                                    | 4.7530(2)                                         | 9.5569(6)                                                                                                    |
| <i>c</i> (Å)                                                    | 18.9761(6)                                        | 25.9626(17)                                                                                                  |
| $\alpha$ (°)                                                    | 90                                                | 90                                                                                                           |
| $\beta$ (°)                                                     | 125.299(2)                                        | 90.200(2)                                                                                                    |
| $\gamma$ (°)                                                    | 90                                                | 90                                                                                                           |
| <i>V</i> (Å <sup>3</sup> )                                      | 909.02(6)                                         | 5968.6(7)                                                                                                    |
| <i>Z</i>                                                        | 4                                                 | 4                                                                                                            |
| <i>D</i> <sub>calc</sub> (g cm <sup>-3</sup> )                  | 2.379                                             | 2.013                                                                                                        |
| <i>F</i> (000)                                                  | 612.0                                             | 3468                                                                                                         |
| $\theta$ <sub>max</sub> (°)                                     | 25.242                                            | 25.242                                                                                                       |
| <i>R</i> <sub>int</sub>                                         | 0.0249                                            | 0.1718                                                                                                       |
| <i>R</i> <sub>1</sub> <sup>a</sup> [ <i>I</i> > 2σ( <i>I</i> )] | 0.0342                                            | 0.1354                                                                                                       |
| w <i>R</i> <sub>2</sub> <sup>b</sup> (all data)                 | 0.0984                                            | 0.1927                                                                                                       |
| GOF                                                             | 1.069                                             | 1.065                                                                                                        |

$$^a R_1 = \Sigma||F_o| - |F_c|| / \Sigma|F_o|, \quad ^b wR_2 = \Sigma[w(F_o^2 - F_c^2)^2] / \Sigma[w(F_o^2)^2]^{1/2}.$$

## Supporting Information

**Table S2** Selected bond distances (Å) and angles (°) for CP 1.

|                       |            |                       |            |
|-----------------------|------------|-----------------------|------------|
| I1–Cu1                | 2.5577(8)  | Cu1–Cu1 <sup>#2</sup> | 3.0506(9)  |
| I1–Cu1 <sup>#1</sup>  | 2.5786(10) | Cu1–N1                | 2.025(4)   |
| Cu1–Cu1 <sup>#1</sup> | 3.0506(9)  | Cu1–I1–Cu1            | 72.87(2)   |
| I1–Cu1–I1             | 121.64(4)  | Cu1–Cu1–Cu1           | 102.34(4)  |
| I1–Cu1–Cu1            | 53.88(3)   | N1–Cu1–I1             | 113.69(13) |
| I1–Cu1–Cu1            | 53.250(19) | N1–Cu1–I1             | 112.64(13) |
| I1–Cu1–Cu1            | 127.45(5)  | N1–Cu1–Cu1            | 114.90(13) |
| I1–Cu1–Cu1            | 69.02(4)   | N1–Cu1–Cu1            | 135.09(14) |

Symmetry codes: <sup>#1</sup>: 1 – x, 0.5 + y, –0.5 – z; <sup>#2</sup>: 1 – x, –0.5 + y, –0.5 – z.

**Table S3** Selected bond distances (Å) and angles (°) for CP 2.

|             |            |                      |           |
|-------------|------------|----------------------|-----------|
| I1–Cu1      | 2.7816(16) | Cu4–N6 <sup>#2</sup> | 2.048(9)  |
| I1–Cu2      | 2.6752(15) | I1–Cu1–Cu4           | 56.94(4)  |
| I1–Cu4      | 2.6703(15) | N1–Cu1–I1            | 96.9(3)   |
| Cu1–N1      | 2.045(8)   | N1–Cu1–I2            | 112.1(2)  |
| Cu1–I2      | 2.6407(16) | N1–Cu1–Cu2           | 137.6(3)  |
| Cu1–Cu2     | 2.6441(19) | N1–Cu1–Cu3           | 155.0(3)  |
| Cu1–Cu3     | 2.7151(18) | N1–Cu1–I4            | 110.0(2)  |
| Cu1–I4      | 2.6716(15) | N1–Cu1–Cu4           | 140.5(2)  |
| Cu1–Cu4     | 2.8199(17) | I2–Cu1–I1            | 116.82(6) |
| I3–Cu3      | 2.7567(16) | I2–Cu1–Cu2           | 62.01(5)  |
| I3–Cu4      | 2.6577(16) | I2–Cu1–Cu3           | 60.82(5)  |
| Cu3–I4      | 2.6262(16) | I2–Cu1–I4            | 112.02(6) |
| Cu3–Cu4     | 2.6431(19) | I2–Cu1–Cu4           | 106.50(6) |
| I4–Cu4      | 2.7733(16) | Cu2–Cu1–I1           | 59.02(4)  |
| Cu2–Cu1–Cu3 | 63.27(5)   | Cu1–Cu3–Cu2          | 57.13(5)  |
| Cu2–Cu1–I4  | 110.58(5)  | Cu1–Cu3–I3           | 108.00(5) |
| Cu2–Cu1–Cu4 | 57.75(5)   | I2–Cu3–Cu1           | 58.23(4)  |
| Cu3–Cu1–I1  | 107.65(5)  | I2–Cu3–Cu2           | 59.03(4)  |
| Cu3–Cu1–Cu4 | 57.01(5)   | I2–Cu3–I3            | 106.68(5) |
| I4–Cu1–I1   | 107.90(5)  | N2–Cu3–Cu1           | 152.8(3)  |
| I4–Cu1–Cu3  | 58.35(4)   | N2–Cu3–I2            | 108.9(3)  |
| I4–Cu1–Cu4  | 60.59(4)   | N2–Cu3–Cu2           | 140.9(3)  |
| I1–Cu2–I2   | 117.71(5)  | N2–Cu3–I3            | 98.6(3)   |
| I1–Cu2–Cu3  | 107.92(5)  | N2–Cu3–I4            | 111.9(2)  |
| Cu1–Cu2–I1  | 63.05(5)   | N2–Cu3–Cu4           | 139.6(3)  |
| Cu1–Cu2–I2  | 58.93(5)   | I3–Cu3–Cu2           | 57.28(4)  |
| Cu1–Cu2–I3  | 112.85(5)  | I4–Cu3–Cu1           | 60.00(4)  |
| Cu1–Cu2–Cu3 | 59.60(5)   | I4–Cu3–I2            | 111.20(5) |
| I2–Cu2–Cu3  | 58.66(4)   | I4–Cu3–Cu2           | 106.91(5) |
| I3–Cu2–I1   | 112.65(5)  | I4–Cu3–I3            | 118.50(6) |
| I3–Cu2–I2   | 108.91(5)  | I4–Cu3–Cu4           | 63.51(5)  |
| I3–Cu2–Cu3  | 60.33(4)   | Cu4–Cu3–Cu1          | 63.49(5)  |

## Supporting Information

|             |           |             |           |
|-------------|-----------|-------------|-----------|
| Cu4–Cu2–I1  | 60.28(5)  | Cu4–Cu3–I2  | 109.63(5) |
| Cu4–Cu2–Cu1 | 64.47(5)  | Cu4–Cu3–Cu2 | 57.87(5)  |
| Cu4–Cu2–I2  | 109.32(5) | Cu4–Cu3–I3  | 58.92(5)  |
| Cu4–Cu2–I3  | 60.04(4)  | I1–Cu4–Cu1  | 60.81(4)  |
| Cu4–Cu2–Cu3 | 57.87(5)  | I1–Cu4–I4   | 108.18(5) |
| N5–Cu2–I1   | 106.9(2)  | Cu2–Cu4–I1  | 60.46(4)  |
| N5–Cu2–Cu1  | 138.1(2)  | Cu2–Cu4–Cu1 | 57.79(5)  |
| N5–Cu2–I2   | 101.2(3)  | Cu2–Cu4–I3  | 60.47(4)  |
| N5–Cu2–I3   | 108.5(2)  | Cu2–Cu4–Cu3 | 64.26(5)  |
| N5–Cu2–Cu3  | 145.0(2)  | Cu2–Cu4–I4  | 107.55(5) |
| N5–Cu2–Cu4  | 149.4(3)  | I3–Cu4–I1   | 113.18(5) |
| I3–Cu4–Cu1  | 107.80(6) | N6–Cu4–I1   | 109.7(3)  |
| I3–Cu4–I4   | 116.82(5) | N6–Cu4–Cu1  | 142.9(3)  |
| Cu3–Cu4–I1  | 113.25(5) | N6–Cu4–Cu2  | 153.1(3)  |
| Cu3–Cu4–Cu1 | 59.50(5)  | N6–Cu4–I3   | 108.6(2)  |
| Cu3–Cu4–I3  | 62.67(5)  | N6–Cu4–Cu3  | 135.8(3)  |
| Cu3–Cu4–I4  | 57.95(4)  | N6–Cu4–I4   | 99.3(3)   |
| I4–Cu4–Cu1  | 57.06(4)  |             |           |

Symmetry codes: #1:  $-x, 0.5 + y, 1.5 - z$ ; #2:  $-x, -0.5 + y, 1.5 - z$ ; #3:  $1 - x, 0.5 + y, 1.5 - z$ ; #4:  $1 - x, -0.5 + y, 1.5 - z$ .

**Table S4** Cartesian coordinates of the geometrically optimized CP 1.

| Atom | <i>x</i>    | <i>y</i>    | <i>z</i>    |
|------|-------------|-------------|-------------|
| N    | 6.40562948  | 0.61699204  | 0.32280202  |
| H    | 5.90618342  | 1.34216809  | 0.81652906  |
| C    | 5.71186943  | -0.47192903 | -0.11449401 |
| O    | 6.24425344  | -1.50088611 | -0.51446604 |
| C    | 4.20874730  | -0.34418003 | -0.09318801 |
| C    | 3.45965325  | -1.52404211 | -0.07711401 |
| C    | 3.52234125  | 0.87360306  | -0.12431001 |
| C    | 2.07419715  | -1.44618710 | -0.06149700 |
| H    | 3.97018328  | -2.47983518 | -0.08245201 |
| H    | 4.04464929  | 1.82229613  | -0.18898401 |
| C    | 2.13193915  | 0.86850706  | -0.11521301 |
| N    | 1.41620110  | -0.26955302 | -0.07577401 |
| H    | 1.45539810  | -2.33715717 | -0.03811200 |
| H    | 1.55840411  | 1.78949513  | -0.14304601 |
| Cu   | -0.58039704 | -0.20303301 | -0.03064800 |
| I    | -2.43021417 | -2.19389416 | 0.06316300  |
| I    | -1.64157512 | 2.44681418  | -0.03415800 |
| Cu   | -3.01674322 | 0.30189502  | 0.04101800  |
| C    | 7.85734455  | 0.60635105  | 0.40709103  |
| H    | 8.24816058  | 1.60096412  | 0.17523701  |
| H    | 8.20496558  | 0.30604702  | 1.40339810  |
| H    | 8.23056760  | -0.11348301 | -0.32168602 |

## Supporting Information

**Table S5** Cartesian coordinates of the geometrically optimized solvent-free CP 2.

| Atom | <i>x</i>    | <i>y</i>    | <i>z</i>    |
|------|-------------|-------------|-------------|
| C    | -3.90859707 | -3.66839352 | 2.54996911  |
| C    | -5.11678112 | -4.30705665 | 1.92774407  |
| O    | -5.12045910 | -4.64262167 | 0.74270998  |
| N    | -6.18057018 | -4.49846373 | 2.75215913  |
| H    | -6.20317923 | -4.01190270 | 3.63681519  |
| C    | -3.58607605 | -3.74489151 | 3.90847721  |
| C    | -3.03389205 | -2.98322442 | 1.70332805  |
| H    | -4.21554006 | -4.29663859 | 4.59992926  |
| C    | -2.42021400 | -3.13137939 | 4.36398824  |
| N    | -1.91963801 | -2.38435730 | 2.14207908  |
| H    | -3.24124607 | -2.91522943 | 0.64140597  |
| H    | -2.13234398 | -3.17925837 | 5.40834129  |
| C    | -1.61676298 | -2.45768829 | 3.45079618  |
| Cu   | -0.79082801 | -1.20196514 | 0.88579399  |
| H    | -0.69952595 | -1.96351019 | 3.75384320  |
| I    | 1.83863320  | -1.44768300 | 1.73193105  |
| Cu   | 0.83112796  | 1.06577412  | 0.87033399  |
| Cu   | 1.15432612  | -0.90119000 | -0.92342714 |
| I    | -1.32467300 | -1.96834923 | -1.71280219 |
| Cu   | -1.09916916 | 0.72558497  | -0.92155714 |
| I    | -1.84968225 | 1.35005297  | 1.64571404  |
| I    | 1.43214196  | 1.76349721  | -1.72256120 |
| N    | 2.55172028  | -1.93216198 | -2.03917722 |
| N    | -2.35133130 | 1.67366796  | -2.25354823 |
| N    | 1.84873996  | 2.32149128  | 2.15084808  |
| C    | -2.15022728 | 1.50571996  | -3.57344033 |
| C    | -3.35852543 | 2.45640795  | -1.84816221 |
| C    | 2.34313227  | -1.97679800 | -3.32335831 |
| C    | 3.64727540  | -2.53957295 | -1.53456318 |
| C    | 1.56564294  | 2.29233626  | 3.46594118  |
| C    | 2.83663997  | 3.11621040  | 1.72114105  |
| C    | -2.95223837 | 2.11587195  | -4.53105340 |
| H    | -1.32500518 | 0.85809797  | -3.84960635 |
| C    | -4.20496453 | 3.12252595  | -2.73823827 |
| H    | -3.49797345 | 2.55961295  | -0.77793813 |
| C    | 3.14746937  | -2.60363899 | -4.26049038 |
| C    | 4.53236151  | -3.22259095 | -2.36662824 |
| H    | 3.80314941  | -2.47704394 | -0.46438511 |
| H    | 0.75853992  | 1.63123316  | 3.76319520  |
| C    | 2.26286394  | 3.05667136  | 4.39446325  |

## Supporting Information

|   |             |             |             |
|---|-------------|-------------|-------------|
| C | -3.99578050 | 2.93792094  | -4.10844036 |
| H | -2.76623835 | 1.94261995  | -5.58512645 |
| C | -5.30372565 | 3.96190694  | -2.15279023 |
| H | 2.92488635  | -2.59132301 | -5.32064848 |
| C | 4.27703749  | -3.24637897 | -3.74759734 |
| C | 5.72925962  | -3.86189892 | -1.72053019 |
| C | 3.57870098  | 3.93253651  | 2.57872012  |
| H | 3.04658299  | 3.10590341  | 0.65749997  |
| H | -4.65041658 | 3.40236794  | -4.83945242 |
| O | -5.74745469 | 3.73594089  | -1.02608315 |
| N | -5.77492778 | 4.96284598  | -2.94244528 |
| H | 4.96687057  | -3.73708495 | -4.42855439 |
| O | 6.17989363  | -3.43836086 | -0.65596212 |
| N | 6.27601773  | -4.91284896 | -2.38667324 |
| C | 3.28543996  | 3.89070749  | 3.94516121  |
| C | 4.66603000  | 4.77052463  | 1.96991707  |
| H | 2.01330693  | 2.99249634  | 5.44773134  |
| H | -5.23943574 | 5.23647403  | -3.75359734 |
| H | 5.74422375  | -5.35305100 | -3.12354930 |
| H | 3.86022996  | 4.47592756  | 4.65625226  |
| O | 5.19838906  | 4.44951565  | 0.90674599  |
| N | 5.02431895  | 5.88112973  | 2.66724212  |
| H | 4.41937589  | 6.20992571  | 3.40592418  |
| C | 7.40527287  | -5.64337092 | -1.83233520 |
| H | 7.86434795  | -6.23872893 | -2.62393026 |
| H | 8.13480287  | -4.93050784 | -1.44403918 |
| H | 7.10009090  | -6.30560498 | -1.01291314 |
| C | 6.03312997  | 6.79512886  | 2.15524109  |
| H | 6.39141996  | 7.42237493  | 2.97394614  |
| H | 6.86473604  | 6.21613089  | 1.74999106  |
| H | 5.63717188  | 7.43494887  | 1.35692803  |
| C | -7.42573621 | -5.05935285 | 2.25154309  |
| H | -7.19673317 | -5.89216387 | 1.58447404  |
| H | -8.01722524 | -5.42070092 | 3.09521515  |
| H | -8.01070134 | -4.31944383 | 1.69145405  |
| C | -6.80311690 | 5.87422995  | -2.46545825 |
| H | -6.39822793 | 6.61661404  | -1.76663720 |
| H | -7.24412194 | 6.38958699  | -3.32101731 |
| H | -7.57529493 | 5.30182188  | -1.94839621 |

---

## Supporting Information

**Table S6** The UV photocatalytic degradation rates of two photocatalysts against five organic dyes (After 4 hours of irradiation using a UV lamp with a wavelength of 254 nm and a power of 20 W).

| Dye               | MB     | MO     | CR     | GV     | RhB    |
|-------------------|--------|--------|--------|--------|--------|
| CP 1              | 83.76% | 40.06% | 97.98% | 93.20% | 51.90% |
| Solvent-free CP 2 | 12.79% | 44.02% | 99.19% | 75.70% | 8.86%  |

**Table S7** Emission lifetimes of CP 1 and solvent-free CP 2 in different concentrations of CR solution.

| CR (mg/L) (298.15 K)                | 0    | 10   | 20   | 30   |
|-------------------------------------|------|------|------|------|
| CP 1 ( $\mu\text{s}$ )              | 1.82 | 1.80 | 1.79 | 1.65 |
| $\chi^2_{\text{CP 1}}$              | 1.11 | 1.16 | 1.10 | 1.07 |
| Solvent-free CP 2 ( $\mu\text{s}$ ) | 2.46 | 2.38 | 2.37 | 2.26 |
| $\chi^2_{\text{Solvent-free CP 2}}$ | 1.48 | 1.21 | 1.12 | 1.05 |

**Table S8** Emission lifetimes of solvent-free CP 2 and solvent-free CP 2@PAN after the addition of different volumes of toluene

| Toluene ( $\mu\text{L}$ ) (298.15 K)    | 0    | 5.0  | 6.0  | 7.0  | 8.0  | 9.0  | 10.0 |
|-----------------------------------------|------|------|------|------|------|------|------|
| Solvent-free CP 2 ( $\mu\text{s}$ )     | 4.13 | 4.45 | 4.65 | 4.68 | 4.48 | 4.45 | 4.41 |
| $\chi^2_{\text{solvent-free CP 2}}$     | 1.02 | 1.06 | 1.09 | 1.03 | 1.04 | 1.13 | 1.04 |
| Solvent-free CP 2@PAN ( $\mu\text{s}$ ) | 3.02 | 4.15 | 5.51 | 5.58 | 5.65 | 5.91 | 6.01 |
| $\chi^2_{\text{CP 2@PAN}}$              | 1.22 | 1.05 | 1.05 | 1.05 | 1.04 | 1.04 | 1.01 |

## Supporting Information

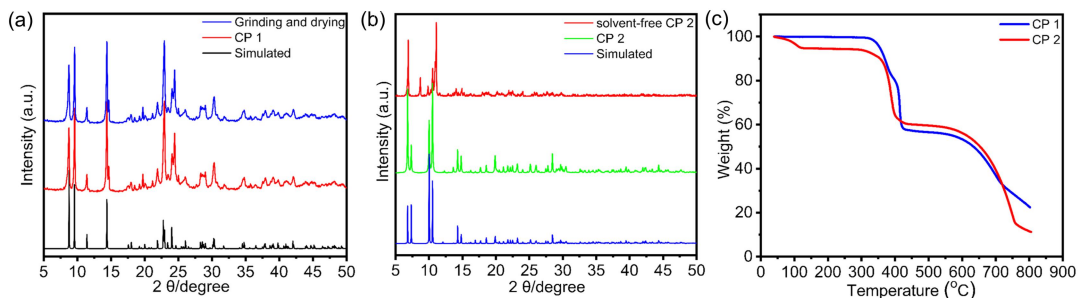

**Fig. S1** (a) The black line is the PXRD simulated by Mercury, the red line is the PXRD of CP 1, and the blue line is the PXRD of the sample after grinding vacuum treatment; (b) The blue line is the PXRD simulated by Mercury, the green line is the PXRD of CP 2 and the red line is the PXRD of the sample after grinding vacuum treatment; (c) Thermogravimetric curves of CP 1 and CP 2.

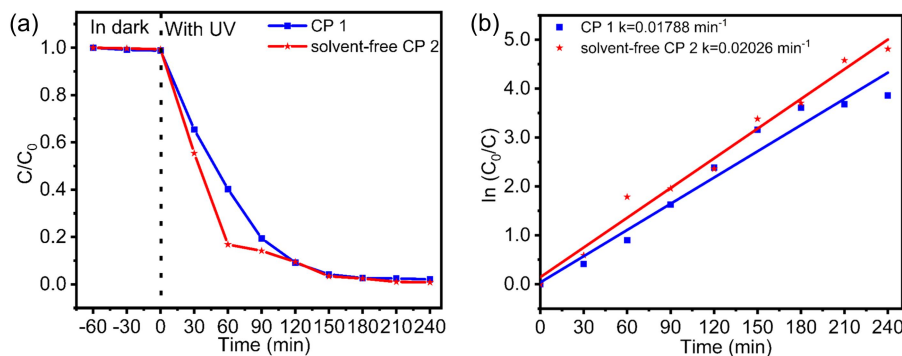

**Fig. S2** (a) Comparison of the degradation of CR by CP 1 and solvent-free CP 2; (b) The linear relationship of  $\ln(C_0/C)$  versus the reaction time in CP 1 and solvent-free CP 2 for CR degradation experiments.

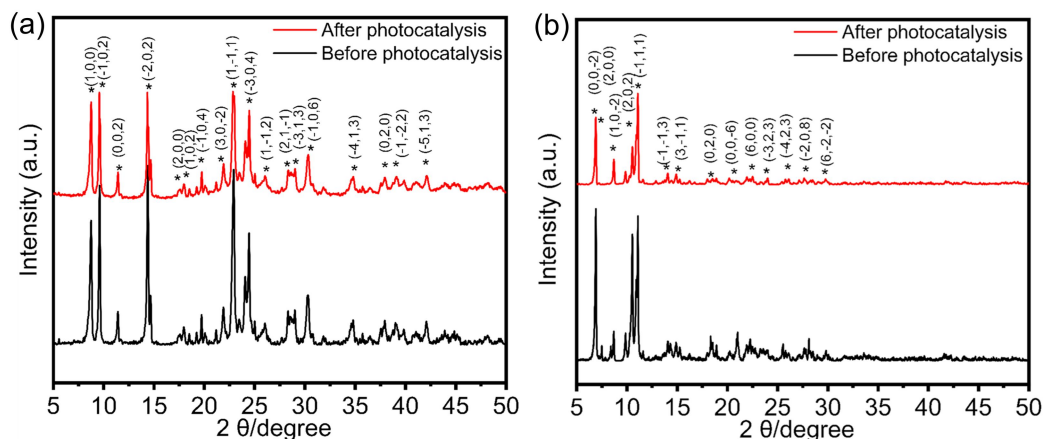

**Fig. S3** (a) The PXRD patterns of CP 1 under different conditions; (b) The PXRD patterns of solvent-free CP 2 under different conditions.

## Supporting Information

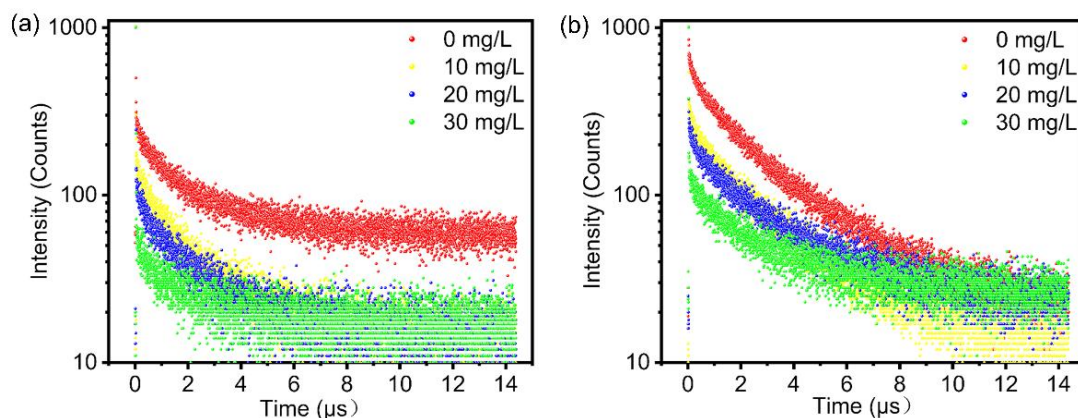

**Fig. S4** (a) Emission lifetimes of CP 1 in different concentrations of Congo red solution; (b) Emission lifetimes of solvent-free CP 2 in different concentrations of CR solution.

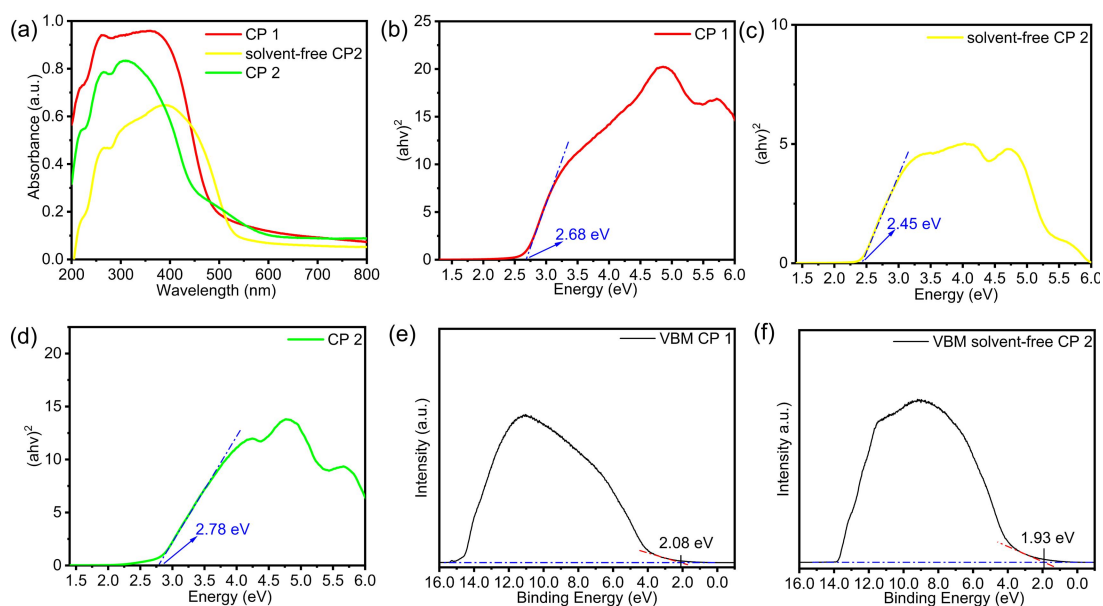

**Fig. S5** (a) UV-Vis diffuse reflectance absorption spectrum; (b–d) Tauc curves of cuprous iodide polymers with the red line representing CP 1, the yellow line representing solvent-free CP 2, the green line representing CP 2; (e) Ultraviolet photoelectron spectra (UPS) of CP 1; (f) Ultraviolet photoelectron spectra (UPS) of solvent-free CP 2.



## Supporting Information

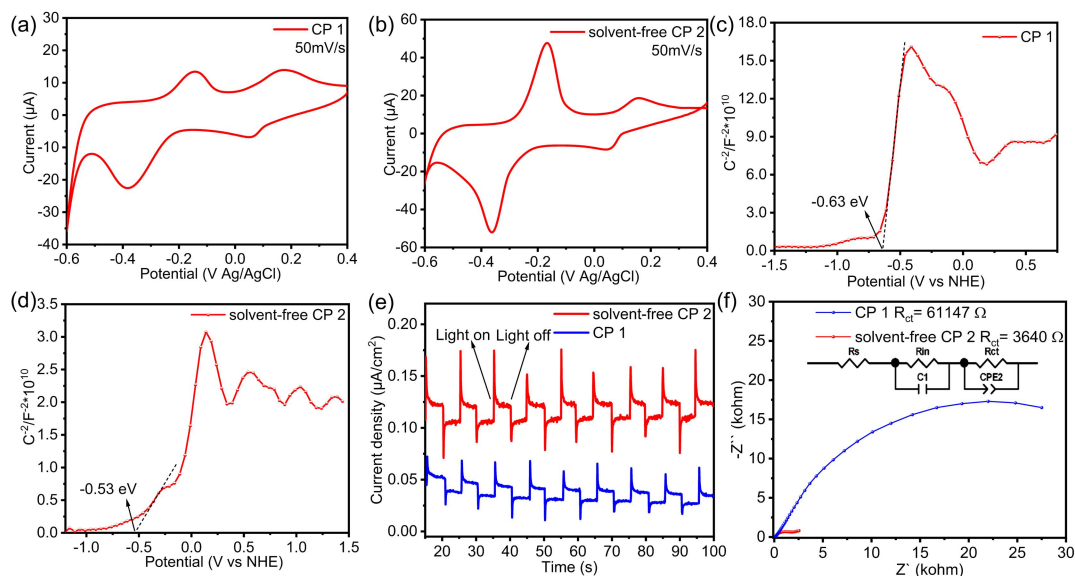

**Fig. S6** (a) The CV curve of CP 1; (b) The CV curve of solvent-free CP 2; (c) M-S curve of CP 1; (d) The M-S curve of solvent-free CP 2; (e) Transient photocurrent responses of CP 1 and solvent-free CP 2 under visible light irradiation; (f) Electrochemical impedance spectra (EIS) of CP 1 and solvent-free CP 2.

The working electrode utilizes a glassy carbon electrode (GCE). The fabrication process involves polishing the GCE into a mirror-like surface on deer skin in an "8"-shaped trajectory using various sizes of alumina powder. Subsequently, the polished electrode is ultrasonicated sequentially in anhydrous ethanol and ultrapure water for 15 minutes, followed by air-drying at room temperature for later use. The GCE is activated in 20.0 mL of 0.1 mol/L H<sub>2</sub>SO<sub>4</sub> using cyclic voltammetry (CV). The voltages of the oxidation and reduction peaks are observed, and their difference should be less than 80 mV.

For sample preparation, 10.0 mg of the sample is ground with 40.0 mg of acetylene black in a quartz mortar for 20 minutes until homogeneous. 5.0 mg mixture is added to a 1.0 mL sample vial along with 100 μL anhydrous ethanol, 100.0 μL ultrapure water, and 40.0 μL Nafion™. After ultrasonication for 40 minutes at room temperature, 5.0 μL of the resulting mixture is pipetted onto the dry, smooth spots of the GCE. The electrode is air-dried at room temperature afterward.

## Supporting Information

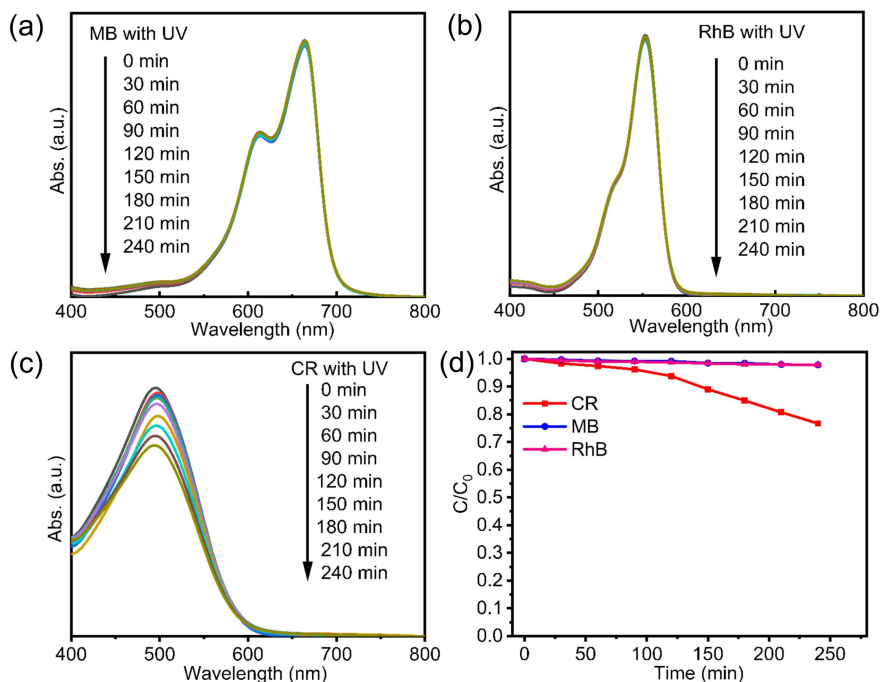

**Fig. S7** (a) UV-vis absorption spectra of MB without CPs (50 ml of dye solution, 20 mg/L) irradiated under 254 nm UV light; (b) UV-vis absorption spectra of RhB without CPs (50 ml of dye solution, 20 mg/L) irradiated under 254 nm UV light; (c) UV-vis absorption spectra of MB without CPs (50 ml of dye solution, 20 mg/L) irradiated under 254 nm UV light. (d) Self-degradation trend of three dyes (CR, MB and RhB) after irradiation under 254 nm UV light.

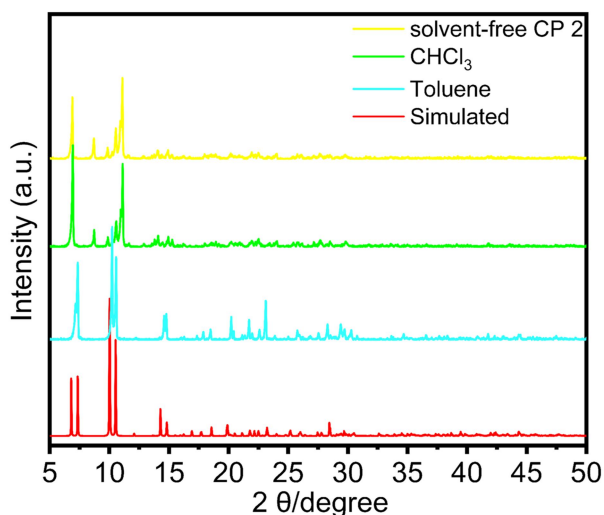

**Fig. S8** PXRD of solvent-free CP 2 in different polar VOC gas atmospheres, the green line represents the moderately polar  $\text{CHCl}_3$  and the blue line represents the weakly polar Toluene.

## Supporting Information

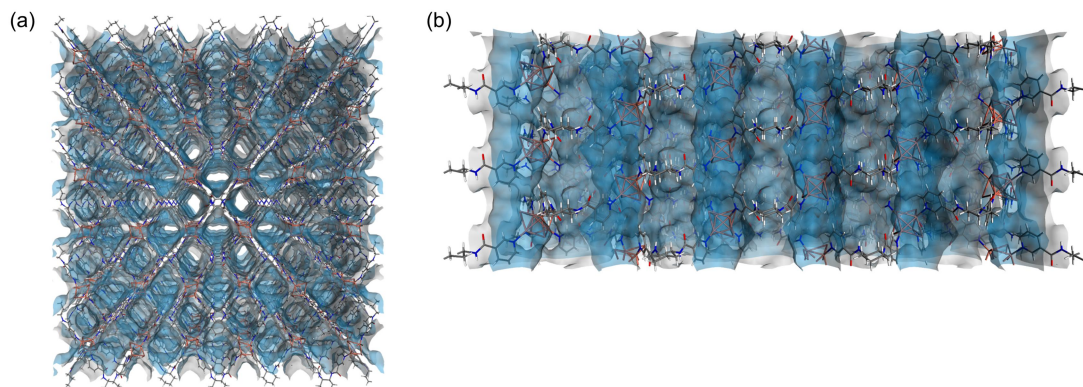

**Fig. S9** Simulated solvent-free CP 2 pore diagram from Materials Studio 2020.<sup>S1-S4</sup> Materials Studio 2020 simulated solvent-free CP 2 pore diagram, blank and grey represent pores.

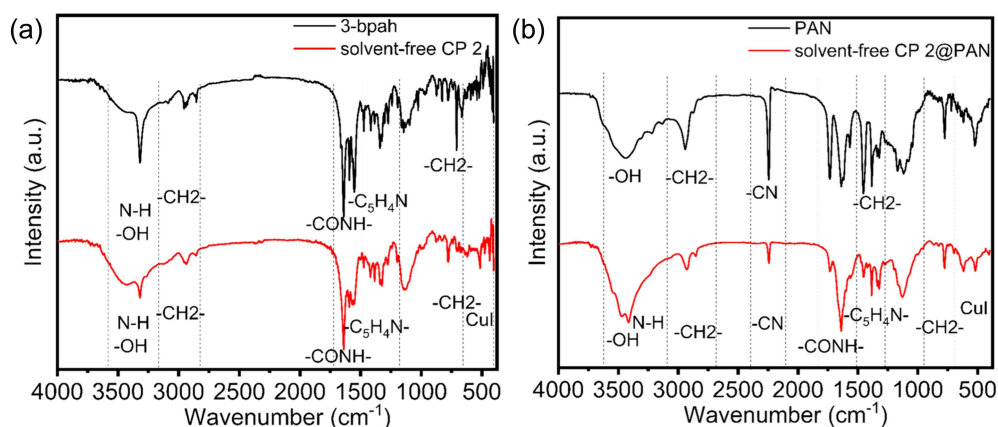

**Fig. S10** (a) IR spectra of 3-bpah (black line) and solvent-free CP 2 (red line); (b) IR spectra of PAN (black line) and solvent-free CP 2@PAN (red line).

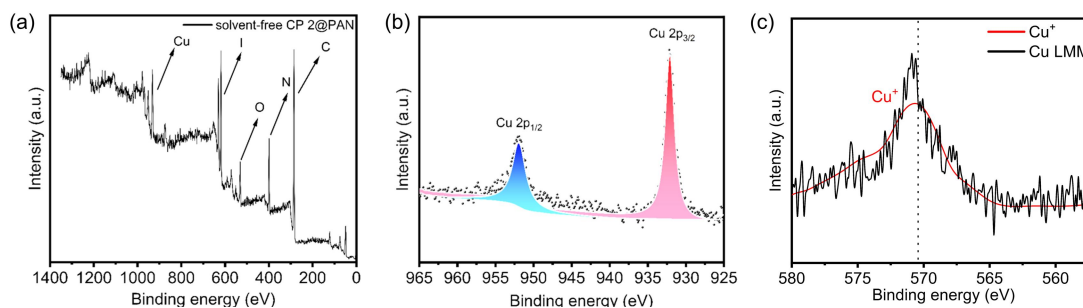

**Fig. S11** (a) Full XPS spectra of solvent-free CP 2@PAN with all characteristic peaks identified; (b) XPS spectra of Cu 2p of solvent-free CP 2@PAN; (c) Cu LMM Auger spectra of solvent-free CP 2@PAN.

## Supporting Information

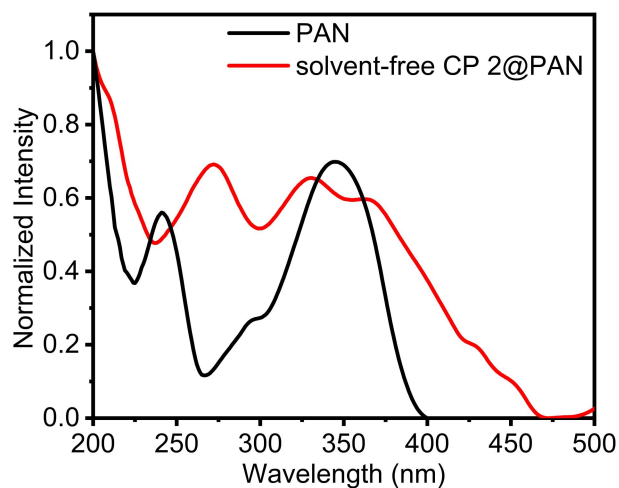

**Fig. S12** Normalized excitation spectrum of solvent-free CP 2@PAN and PAN.

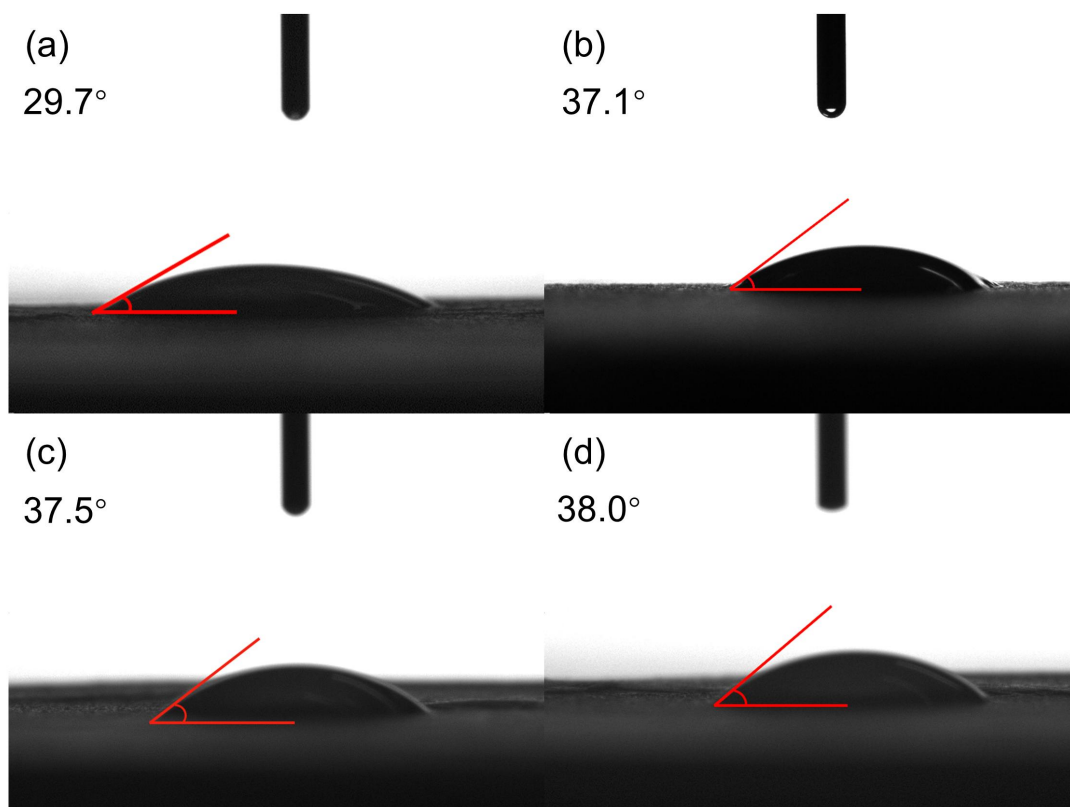

**Fig. S13** Film surface wettability. (a) Instantaneous wetting of polyacrylonitrile films by water; (b) Instantaneous wetting effect of water on doped polyacrylonitrile films; (c) Instantaneous wetting effect of water on doped films after primary water rinse drying; (d) Instantaneous wetting effect of water on doped films after second water rinse drying.

## Supporting Information

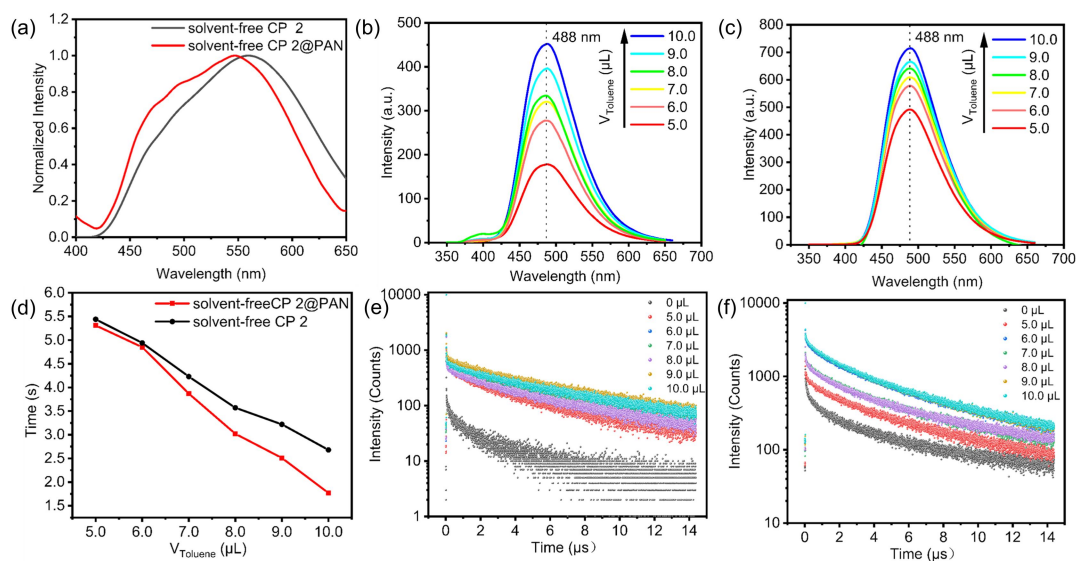

**Fig. S14** (a) Normalized emission spectra of solvent-free CP 2 and solvent-free CP 2@PAN; (b) Change of photoluminescence spectrum of solvent-free CP 2@PAN after addition of different volumes of toluene; (c) Change of photoluminescence spectrum of solvent-free CP 2 after addition of different volumes of toluene; (d) Comparison of the time required for complete discoloration of solvent-free CP 2 and solvent-free CP 2@PAN after addition of different volumes of toluene; (e) Emission lifetimes of solvent-free CP 2@PAN after addition of different volumes of toluene; (f) Emission lifetimes of solvent-free CP 2 after addition of different volumes of toluene.

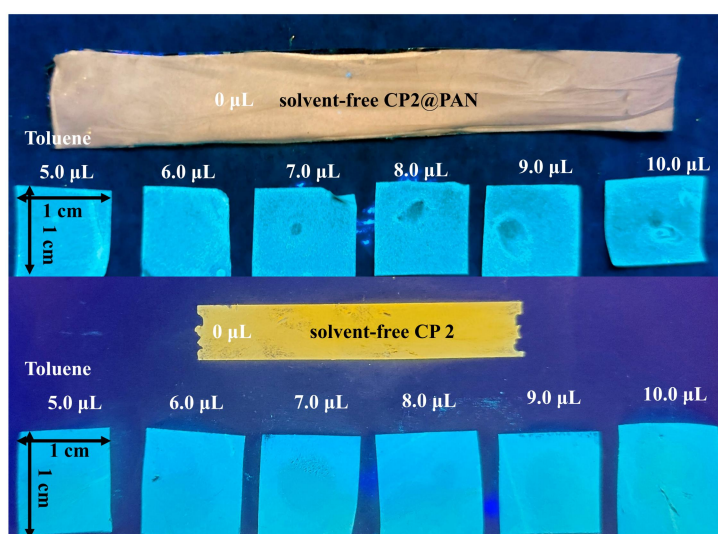

**Fig. S15** The picture of complete discoloration of solvent-free CP 2 and solvent-free CP 2@PAN after addition of different volumes of toluene.

## Supporting Information

### References

S1 S. H. Vosko, L. Wilk and M. Nusair, *J. Physique.*, 1980, **58**, 1200–1211.

S2 A. D. Becke, *Phys. Rev. A*, 1988, **38**, 3098–3100.

S3 C. Lee, W. Yang and R. G. Parr, *Phys. Rev. B*, 1988, **37**, 785–789.

S4 A. D. Becke, *J. Chem. Phys.*, 1993, **98**, 5648–5652.
